# Supplementary material for: Phytotoxin synthesis genes and type III effector genes of Pseudomonas syringae pv. actinidiae biovar 6 are regulated by culture conditions
Source: PeerJ. 2020 Aug 14;8:e9697. doi: 10.7717/peerj.9697 (PMC7430302; doi:10.7717/peerj.9697)
Supplement: Supplemental Information 6 [file peerj-08-9697-s006.xlsx]

## Sheet: Sheet1
Supplemental Table S4. Comparison of gene expression level of each virulence gene between RNA-seq and RT-qPCR
Genes	Cultivation condition	RT-qPCRa	RNA-seqa
argD	27HSC	-0.0300721	-0.201311
	18HS	-0.390024	-1.49428
	18HSC	0.0240578	-0.580049
argK	27HSC	0.107141	0.324976
	18HS	-0.822975	-0.779005
	18HSC	-0.292438	-1.43257
cfa5	27HSC	0.0572346	0.575867
	18HS	-0.243599	-2.95742
	18HSC	-0.385406	-1.27067
cfa9	27HSC	-0.936105	-2.11537
	18HS	-0.503426	-2.46912
	18HSC	-0.438827	-0.388573
cfl	27HSC	-0.889134	-1.2166
	18HS	-1.09096	-1.21509
	18HSC	-1.01132	-1.45956
cmaD	27HSC	-2.4355	-5.32019
	18HS	-1.30723	-5.89899
	18HSC	-2.46852	-5.32403
corR	27HSC	0.619567	0.827349
	18HS	-0.168568	-0.85579
	18HSC	0.234568	-0.165952
corP	27HSC	-0.593493	-0.926349
	18HS	-0.64864	-5.53564
	18HSC	-0.727554	-0.0395187
avrE1	27HSC	0.260389	0.675594
	18HS	0.281973	0.501946
	18HSC	0.503187	-0.256714
hopQ1	27HSC	-0.0273989	0.438177
	18HS	0.535471	0.479023
	18HSC	0.489925	0.509639
hopY1	27HSC	-0.285827	0.414297
	18HS	0.494538	0.793039
	18HSC	0.286779	0.386579
hopAE1	27HSC	0.438039	0.79323
	18HS	1.26899	1.10092
	18HSC	0.626136	-0.975393
hopR1	27HSC	0.180618	0.0652001
	18HS	-0.388673	-0.95708
	18HSC	-0.724454	-0.544136
avrPto5	27HSC	-0.108427	-0.115755
	18HS	0.287641	0.0355413
	18HSC	0.522922	0.0507557
hopAU1	27HSC	-0.0760401	-0.272578
	18HS	1.23935	0.602707
	18HSC	1.11551	0.45393
White indiates that expression level was little changed relative to the condition of 27ºC-HS (-1<Log2<1).
Yellow indicates that expression level was high relative to the condition of 27ºC-HS (Log2≧ 1).
Blue indicates that expression level was low relative to the condition of 27ºC-HS (Log2≦-1).
