# Supplementary material for: Phytotoxin synthesis genes and type III effector genes of Pseudomonas syringae pv. actinidiae biovar 6 are regulated by culture conditions
Source: PeerJ. 2020 Aug 14;8:e9697. doi: 10.7717/peerj.9697 (PMC7430302; doi:10.7717/peerj.9697)
Supplement: Supplemental Information 8 [file peerj-08-9697-s008.xlsx]

## Sheet: Sheet1
Supplemental Table S6. Temporal change of virulence genes of Psa1, Psa3 and Psg in different culture conditions
		27HS		27HSC		27LB		27hrp
		3h	6h	3h	6h	3h	6h	3h	6h
Psa1	argK	1.21486	3.43348	0.846978	1.84692	4.25191	1.8038	3.90756	1.92839
	argD	0.812482	1.08948	0.609805	0.787149	0.992014	1.22901	0.990842	1.02108
	hopAS1	1.14627	1.65695	0.940946	1.2186	1.73163	1.41724	2.58553	1.05742
	hrpK	0.076228	2.17972	0.0558507	2.01896	0.144646	1.10847	0.0926519	0.817167
	avrE	0.408346	0.446697	0.381358	0.621315	1.26746	1.3095	1.40969	1.07995
	hopM1	0.41387	0.677179	0.394344	0.690865	0.622617	0.816068	1.29504	1.32728
	hopD1	0.864179	1.02439	0.68474	0.878813	1.58905	1.951	1.25793	1.5429
	hopQ1	0.793957	1.05252	0.806191	1.31373	1.24616	1.48319	1.11949	1.40268
	hopAE1	1.12278	1.23855	0.563463	0.79507	1.19051	1.36099	0.739438	0.875371
	hopAZ1	1.08452	1.42146	0.89382	0.942852	1.346	1.32758	0.729976	1.01866
	hrpL	0.557359	0.642239	0.47586	0.617045	1.05978	1.13231	1.24718	1.33208
Psa3	hopAS1	0.814747	1.0113	0.644794	0.713356	0.81226	0.751173	1.00335	0.86757
	hrpK	2.85912	1.55319	1.82013	1.659	2.20835	0.8096	2.25117	0.696817
	avrE	0.868016	1.04225	1.27374	1.73518	1.13386	1.2557	1.0636	1.24813
	hopM1	0.366474	0.573929	0.44075	0.62381	0.492484	0.659789	0.482966	0.697612
	hopD1	1.67945	1.36478	1.3108	1.50049	1.70751	0.582945	1.89164	0.526971
	hopQ1	0.95496	0.931556	0.789825	0.670782	0.825111	0.716832	0.743021	0.6703
	hopAE1	1.92576	1.56384	0.681946	0.69282	1.12598	0.661444	1.3702	0.453561
	hopAZ1	2.07243	1.67658	1.4737	1.46591	1.22427	0.541108	1.32987	0.599083
	hrpL	0.597283	1.31939	0.705608	1.46798	0.767998	1.74284	0.741708	1.62401
Psg	cfa1	1.0536	14.3548	1.20528	13.591	1.49558	13.2989	1.21926	11.6863
	cmaD	1.13185	0.819794	1.48187	1.04393	1.81082	0.670721	1.48425	0.676682
	hopAS1	1.34655	0.783496	1.19295	0.743343	1.4306	0.803243	1.21655	0.788999
	hrpK	1.03929	0.505812	1.30151	0.548921	1.15457	0.790681	1.48989	1.11022
	avrE	14.7461	3.41709	36.0054	3.18068	14.2945	6.29301	3.42572	7.23665
	hopM1	0.897406	4.88123	1.7333	5.43262	1.22003	7.08861	1.80084	10.2133
	hopD1	3.40781	1.02161	5.82732	1.11052	1.15945	0.286462	1.03833	0.265485
	hopAE1	1.09444	0.757496	1.30529	0.803881	1.29504	0.960086	1.18269	0.774812
	hopAZ1	1.20445	0.773403	1.21021	0.850768	1.51458	0.972381	1.3894	1.06624
	hrpL	0.973321	0.505367	0.934771	0.47284	0.554619	0.399727	0.688769	0.553505
All values in each culture condition mean the relative values against 0h in each culture condition.
27HS; HS medium at 27℃, 27HSC; HSC medium at 27℃, 27LB; LB medium at 27℃, 27hrp; hrp-inducing medium at 27℃.
