# Supplementary material for: Phytotoxin synthesis genes and type III effector genes of Pseudomonas syringae pv. actinidiae biovar 6 are regulated by culture conditions
Source: PeerJ journal article supplement (doi:10.7717/peerj.9697), 2020-08-14
Supplement: Supplemental_Figure_S2-(S1-Rv1).pdf [file Supplemental_Figure_S2-%28S1-Rv1%29.pdf]

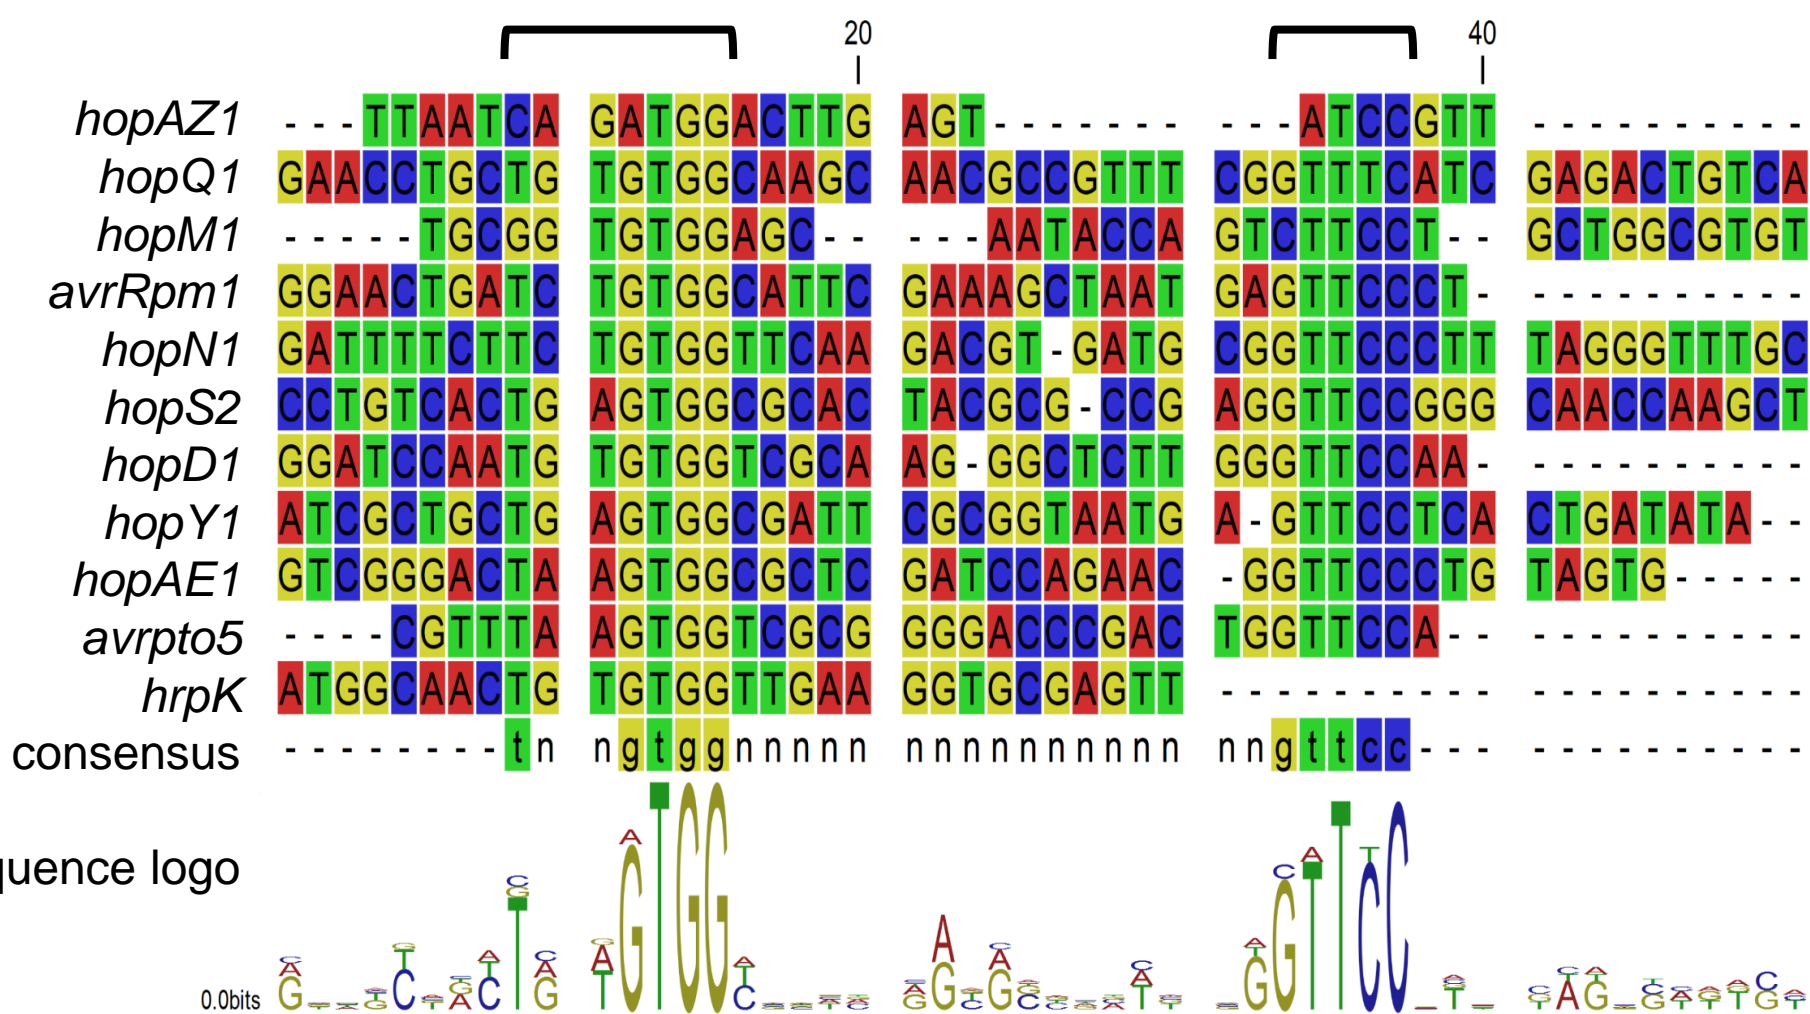

**Supplemental Figure S2. The candidate Hrp box promoter sequences.**

The candidate Hrp box promoter sequences (consensus) were found in the upstream of the early inducible genes of Psa6.
